# Supplementary material
Source: PubMed Central journal article supplement (PMC5846898)

1 **Supplemental Materials**

2

3 **Title:** Epigenetic mechanisms underlying maternal diabetes-associated risk of congenital heart disease

4

5 **Authors:** Madhumita Basu,<sup>1</sup> Jun-Yi Zhu,<sup>2</sup> Stephanie LaHaye<sup>1,3</sup>, Uddalak Majumdar<sup>1</sup>, Kai Jiao<sup>4</sup>, Zhe  
6 Han,<sup>2</sup> and Vidu Garg<sup>1,3,5</sup>

7

8 **Affiliations:**

9 <sup>1</sup>Center for Cardiovascular Research and The Heart Center, Nationwide Children's Hospital, Columbus,  
10 OH 43205

11 <sup>2</sup>Center for Genetic Medicine Research, Children's National Health System, Washington, DC 20010,  
12 USA

13 <sup>3</sup>Department of Molecular Genetics, The Ohio State University, Columbus, OH 43210, USA

14 <sup>4</sup>Department of Genetics, The University of Alabama at Birmingham, Birmingham, AL 35294, USA.

15 <sup>5</sup>Departments of Pediatrics, The Ohio State University, Columbus, OH 43210, USA

16

17

18

19

20

21

22 **Supplemental Figure and Figure Legends:**

23 **Supplemental Figure 1: Gene-environment interaction between MDM and Notch1.** (A-D)

24 Representative images of wildtype (WT) and *Notch1*<sup>+/-</sup> E13.5 embryos from non-diabetic and diabetic  
25 mothers show no apparent growth retardation. (E, F) Three-dimensional reconstruction of E13.5 non-  
26 diabetic and diabetic WT heart (N=1 per group) using AMIRAv5.5 software showed the  
27 perimembranous VSD (\*). AVC, Atrioventricular cushion (green); IVS, interventricular septum (red).  
28 (G) Breeding scheme showing non-diabetic *Notch1*<sup>+/-</sup> males crossed with diabetic (hyperglycemic,  
29 blood glucose >200mg/dl) WT females to test that resultant CHD phenotype is independent of maternal  
30 genetic background. (H-K) Representative histologic sections showing location of VSD (\*) in E13.5  
31 hearts (WT and *Notch1*<sup>+/-</sup>) exposed to maternal diabetes as compared to non-diabetic controls. Scale  
32 bars: (A-D) 1 mm and (H-K) 200  $\mu$ m. RA, right atrium, LA, left atrium; RV, right ventricle; LV, left  
33 ventricle.

34

35 **Supplemental Figure 2: Maternal hyperglycemic stress results in spectrum of birth defects in**

36 **developing embryos.** (B-D) General appearance of E13.5 embryos exposed to increasing level of  
37 maternal glucose (N=3, range of maternal blood glucose (mg/dl) = 389-787 mg/dl at time of embryo  
38 collection) compared to non-diabetic wildtype (WT) control (A). Yellow arrowheads indicate  
39 craniofacial and neural tube defects (C, D). (E-L) Representative hematoxylin & eosin images of E13.5  
40 heart sections demonstrate improper septation of outflow tract (I, K) compared to E and G, enlarged AV  
41 cushion (H, L, black arrowheads), septal defects (J, asterisk and black arrow) and myocardial wall  
42 thinning (H, J, L) compared to control embryos (E, F). Scale bars: (A-D) 1 mm and (E-L) 200  $\mu$ m. RA,

43 right atrium, LA, left atrium; RV, right ventricle; LV, left ventricle; Ao, Aorta; PT, Pulmonary trunk;  
44 CT, common trunk; AVC, Atrioventricular cushion; IVS, Interventricular septum.

45

46 **Supplemental Figure 3: Chromatin accessibility at *Notch1* and its downstream target loci.** (A)  
47 Integrative Genome Viewer (IGV) tracks showing ATAC-seq signals for four open regions (R1-R4) at  
48 *Notch1* loci in NG (red) and HG (blue). (B-E) Chromatin accessibility at the proximal promoter regions  
49 of *Hey2*, *EfnB2*, *Nrg1* and *Jarid2* loci remain unaltered in HG compared in NG. Statistically significant  
50 changes in chromatin accessibility were found at the enhancer, downstream and intronic regions of  
51 *Hey2*, *Efnb2* and *Nrg1* respectively (peaks shown with asterisks).

52

53 **Supplemental Figure 4: Specificity of the probes and quantification of DAR-4M AM<sup>+</sup> and DHE<sup>+</sup>**  
54 **cells.** AVM cells treated with (A, D) DMSO, (B) 250 $\mu$ M DetaNONOate and (E) 300 $\mu$ M H<sub>2</sub>O<sub>2</sub> served as  
55 negative and positive controls for DAR-4M AM and DHE staining, respectively, indicating the  
56 specificity of the dyes. (C, F) Quantification of mean fluorescence intensity of DAR4M<sup>+</sup> and DHE<sup>+</sup> cells  
57 in NG and HG (N $\geq$ 4). Data presented as mean $\pm$ SEM; \*, p-value <0.05 by 2-tailed Student's *t* test. Scale  
58 bars: 50 $\mu$ m (A, B) and 100 $\mu$ m (D, E). (G-I) and (J-L) Endothelial cell-specific NO production was  
59 measured using DAR4M AM (red) staining in E13.5 non-diabetic and diabetes exposed embryos (N=1  
60 per group) co-stained with PECAM (green) and nuclei stained with DAPI (blue). Scale bars: 100 $\mu$ m (G,  
61 I, J, L) and 50 $\mu$ m (H, K).

62

63 **Supplemental Figure 5: Inability of N-acetyl cysteine mediated rescue of VSD phenotype in vivo:**

64 (A) Breeding scheme showing non-diabetic wildtype (WT) males crossed with non-diabetic (blood  
65 glucose = 165-189 mg/dl at time of embryo harvest) and diabetic (blood glucose=229-389 mg/dl at time  
66 of embryo harvest) WT females and subset of these females were treated with N-acetyl cysteine (NAC).  
67 (B) No significant rescue was observed in the incidence of VSD among diabetic groups with (31%) or  
68 without (37%) treatment of NAC. No VSD was observed in non-diabetic control groups (0%). (G-J)  
69 Histologic sections showing location of ventricular septal defects (VSD, \*) in E13.5 hearts from two  
70 representative embryos exposed to maternal diabetes with or without NAC treatment. Non-diabetic  
71 wildtype (WT) control embryos are shown with normal ventricular septation. RA, right atrium, LA, left  
72 atrium; RV, right ventricle; LV, left ventricle. Scale bar: 200  $\mu$ m.

73

74 **Supplemental Figure 6: N-acetyl cysteine mediated rescue in vitro.** AVM cells maintained in NG  
75 and HG were stained for (A-D) ROS generation using H<sub>2</sub>DCFDA (green) and (E-H) NO detected using  
76 DAR4M AM (red) after treatment with 5mM NAC and compared to untreated controls. (I-L) and (M-P)  
77 Immunofluorescent staining demonstrate JARID2 (green) and active NOTCH1 (N1ICD, red) expression  
78 in presence and absence of NAC. Propidium iodide (red, A-D; I-L) and DAPI (blue, E-H; M-P) stain the  
79 nuclei. Scale bar: 50 $\mu$ m. (Q-T) Quantification of mean fluorescent intensity of DCFDA, DAR4M,  
80 JARID2 and N1ICD staining by ImageJ. N<sub>≥</sub>3, Data presented as mean $\pm$ SEM; \*, p-value <0.05 by 2-  
81 tailed Student's *t* test.

82

83

84

85 **Supplemental Figure 7: RNAi transgene rescues shorter lifespan and cardiac phenotype in**  
86 **Drosophila maternal diabetic model.** Survival curves for adult progenies those overexpressing heart  
87 specific *Jarid2*, *Numb*, *Notch* RNAi and *Jarid2* RNAi transgenes are shown. Color-coding identifies  
88 exposure to maternal diabetes and presence of transgenes.

89

90 **Supplemental Figure 8: In vitro ATAC-seq highlights top GO enriched terms altered in**  
91 **hyperglycemic stress.** (A) Gene ontology analysis performed on genes associated with peaks in  
92 “promoter” regions, with p-value <0.05 and >1.5 fold change, highlights the 25 most significant GO  
93 terms. Green: Cellular Architecture, Blue: Chromatin Regulation, Pink: Development, Grey: Other. (B)  
94 Circle plot generated to highlight the 12 GO terms that fall within Chromatin Regulation (Blue),  
95 Development (Pink), or Cellular Architecture (Green) classifications (C). Within the circle plot, the  
96 colored dots represent gene associated peaks that are more open in high glucose (red) or more open in  
97 normal glucose (blue) within each GO term. The size of the rectangle in the inner circle represents the p-  
98 value, with larger rectangles equating to lower p-values. The color of the rectangle represents the z-  
99 score, blue and red representing low and high z-scores respectively. The z-score used in this analysis  
100 refers to the following equation:  $z\text{-score} = (\# \text{ of peaks up} - \# \text{ of peaks down}) / (\text{sqrt of total count})$ ,  
101 allowing for an inference in the overall change of the biological function.

102 **Supplemental Figure 9: Hyperglycemia reduces cardiomyocytes proliferation at E13.5 embryos.**  
103 (A-H) Immunofluorescent staining using phospho-histone H3 (PHH3, Ser10, red) demonstrates  
104 decreased cardiomyocyte proliferation in the interventricular septum (IVS) of the diabetic E13.5 WT  
105 embryonic hearts compared to non-diabetic controls (N=3 each group). cTnT staining (green) is shown  
106 to label cardiomyocytes and corresponding nucleus stained with DAPI (blue). Scale bar (A-H): 20  $\mu\text{m}$ .

107 (I) Quantitation of PHH3<sup>+</sup> cardiomyocytes demonstrated downregulation of cardiomyocyte proliferation  
108 between two groups. N=5. Data presented as mean±SEM; \*, p-value <0.05 by 2-tailed Student's *t* test.

109 (J) Transcript expression of *CyclinD1* is reduced in diabetic WT E13.5 embryonic hearts with respect to  
110 non-diabetic controls (N=6 whole hearts pooled together/ group) as measured with qRT-PCR. Data  
111 shown as average± SD; \*, p-value <0.05 by 2-tailed Student's *t* test.

112

113 **Supplemental Tables:**

114 **Supplemental Table 1: Incidence of VSD in E13.5 WT and *Notch1*<sup>+/-</sup> embryos derived from**  
 115 ***Notch1*<sup>+/-</sup> male and WT diabetic female.**

| Parental Genotype                                | Embryo Genotype              | Embryos with VSD (%) | Fisher Exact p-value (non-diabetic vs. diabetic) |
|--------------------------------------------------|------------------------------|----------------------|--------------------------------------------------|
| Non-diabetic <i>Notch1</i> <sup>+/-</sup> (male) | <i>Notch1</i> <sup>+/-</sup> | 8/9 (88%)            | 0.035*                                           |
| Diabetic WT (female)                             | WT                           | 2/7 (28.7%)          |                                                  |

116 \* indicates statistically significant 2-tailed p value<0.05; WT= wildtype

117 **Supplemental Table 2: Full annotated ATAC-seq features in AVM cells treated with NG and HG**

118 **Supplemental Table 3: Motif enrichment analysis of NG ATAC-seq dataset with HG set as**  
 119 **background identified overrepresented known and de novo motifs respectively.**

120

121

122

123

124

| Known     |         |         | <i>de novo</i> |         |         |
|-----------|---------|---------|----------------|---------|---------|
| Consensus | Motif   | p-value | Consensus      | Motif   | p-value |
|           | * SP1   | 1e-843  |                | NFY     | 1e-1497 |
|           | NFY     | 1e-622  |                | * SP1   | 1e-1192 |
|           | * KLF5  | 1e-485  |                | * ELK1  | 1e-620  |
|           | * KLF14 | 1e-419  |                | NRF1    | 1e-605  |
|           | GFY     | 1e-369  |                | NFY     | 1e-403  |
|           | * KLF9  | 1e-337  |                | ARNT1   | 1e-281  |
|           | ATF3    | 1e-288  |                | GFY     | 1e-277  |
|           | BATF    | 1e-286  |                | E2F3    | 1e-263  |
|           | * KLF4  | 1e-269  |                | GFX     | 1e-259  |
|           | FRA1    | 1e-266  |                | YY1     | 1e-241  |
|           | AP-1    | 1e-262  |                | MTF1    | 1e-209  |
|           | FOSL2   | 1e-221  |                | TCFAP2B | 1e-169  |

125 **Supplemental Table 4: Known and de novo transcription factor binding motifs enriched in NG**  
 126 **compared to HG**

127 **Supplemental Table 5: TFBS profile for Nos3\_R1**

128 **Supplemental Table 6: TFBS profile for Nos3\_R2**

129 **Supplemental Table 7: TFBS profile for Nos3\_R3**

130 **Supplemental Table 8: Incidence of VSD in E13.5 embryos with and without exposure to maternal**  
 131 **diabetes and NAC treatment.**

| <b>Embryonic Genotype</b> | <b>Maternal Environment</b> | <b>Embryos with VSD (%)</b> | <b>p-value (non-diabetic vs. diabetic)</b> | <b>p-value (diabetic vs. diabetic +NAC)</b> |
|---------------------------|-----------------------------|-----------------------------|--------------------------------------------|---------------------------------------------|
| WT                        | Non-diabetic                | 0/5 (0%)                    | NS                                         | -                                           |
|                           | Non-diabetic+ NAC           | 0/9 (0%)                    |                                            |                                             |
| WT                        | Diabetic                    | 3/8 (37%)                   | 0.036*                                     | NS                                          |
|                           | Diabetic + NAC              | 5/16 (31%)                  |                                            |                                             |

132 **\* indicates statistically significant 2-tailed p value<0.05; WT= wildtype, NS=non-significant**

133 **Supplemental Table 9: TFBS profile for Jarid2\_R1**

134 **Supplemental Table 10: TFBS profile for Jarid2\_R2**

135 **Supplemental Table 11: TFBS profile for Jarid2\_R3**



136 **Supplemental Table 12: TFBS profile for Notch1\_R1**

137 **Supplemental Table 13: TFBS profile for Notch1\_R2**

138 **Supplemental Table 14: TFBS profile for Notch1\_R3**

139 **Supplemental Table 15: TFBS profile for Notch1\_R4**

140 **Supplemental Table 16: Differential peaks within 1.5kb upstream and downstream of TSS, P-**  
141 **value<0.05 and >1.5fold change between NG and HG**

142 **Supplemental Table 17: Gene Ontology enriched terms**

143 **Supplemental Table 18: ATAC-seq index primer sequences:**

| <b>Index Primers</b> | <b>Sequence 5'-3'</b>                                  |
|----------------------|--------------------------------------------------------|
| Ad1_noMx             | AATGATACGGCGACCACCGAGATCTACACTCGTCGGCAGCGTCAGATGTG     |
| Ad2.1_TAAGGCGA       | CAAGCAGAAGACGGCATAACGAGATTCGCCTTAGTCTCGTGGGCTCGGAGATGT |
| Ad2.2_CGTA TAG       | CAAGCAGAAGACGGCATAACGAGATCTAGTACGGTCTCGTGGGCTCGGAGATGT |
| Ad2.3_AGGCAGAA       | CAAGCAGAAGACGGCATAACGAGATTTCTGCCTGTCTCGTGGGCTCGGAGATGT |
| Ad2.4_TCCTGAGC       | CAAGCAGAAGACGGCATAACGAGATGCTCAGGAGTCTCGTGGGCTCGGAGATGT |
| Ad2.5_GGACTCCT       | CAAGCAGAAGACGGCATAACGAGATAGGAGTCCGTCTCGTGGGCTCGGAGATGT |
| Ad2.6_TAGGCATG       | CAAGCAGAAGACGGCATAACGAGATCATGCCTAGTCTCGTGGGCTCGGAGATGT |

144

145

| <b>Gene name</b> | <b>Primer Name</b> | <b>Sequence 5'-3'</b>  |
|------------------|--------------------|------------------------|
| 18S              | mus_18S F.P        | ACGACCCATTCGAACGTCTGC  |
|                  | mus_18S R.P        | GGACTCATTCCAATTACAGGG  |
| Gapdh            | mus_Gapdh F.P      | GAAGGGCTCATGACCACAGT   |
|                  | mus_Gapdh R.P      | GATGCAGGGATGATGTTCTGG  |
| Notch1           | mus_Notch1 F.P     | CCAGGAAAGAGGGCATCAGA   |
|                  | mus_Notch1 R.P     | ACACTTCCAGCGTCTTTGGG   |
| Hey1             | mus_Hey1 F.P       | CCAGACTACAGCTCCTCAGATA |
|                  | mus_Hey1 R.P       | CGCCGAACTCAAGTTTCCATT  |
| Hey2             | mus_Hey2 F.P       | CCTGGTCTCTCATCTCAGCA   |
|                  | mus_Hey2 R.P       | GGCCAGAGAGGAAGTCATTG   |
| Nrg1             | mus_Nrg1 F.P       | AAATCGCCCCCTTCGGAAAT   |
|                  | mus_Nrg1 R.P       | GTCACAAGAAGCAGAGGCCT   |
| EfnB2            | mus_EfnB2 F.P      | CATCACTTTGGTGGTGCTGC   |
|                  | mus_EfnB2 R.P      | CCATTGTTGTTGCCACCTCG   |
| Bmp10            | mus_Bmp10 F.P      | TGACCCTTTGCTGGTTGTGT   |

|           |                   |                      |
|-----------|-------------------|----------------------|
|           | mus_Bmp10 R.P     | ATCGGGCCCACTGAAGAAAG |
| Jarid2    | mus_Jarid2 F.P    | CTGGCCTTCACTCTTCTGCA |
|           | mus_Jarid2 R.P    | GCAGATCTGGCACCTCCTTT |
| Cyclin D1 | mus_CyclinD1 F.P  | GCCGAGAAGTTGTGCATCTA |
|           | mus_Cyclin D1 R.P | GTTACCAGAAGCAGTTCCA  |
| Nos3      | mus_Nos3 F.P      | ATTGGCATGAGGGACCTGTG |
|           | mus_Nos3 R.P      | GGTGTCCAGATCCATGCACA |

147

148 **Supplemental Table 20: Oligonucleotide sequences for ChIP qPCR**

| Gene name | Primer Name          | Sequence 5'-3'       |
|-----------|----------------------|----------------------|
| Nos3      | Nos3_R1F.P           | GAAACTCTGCCTCTGTCCGA |
|           | Nos3_R1R.P           | TCACAGTGTCCAGAAGAGGG |
|           | Nos3_R2F.P           | TGAGTCACTTCAGAAGGCCA |
|           | Nos3_R2R.P           | CTAGCTGCCGTTGTGATTCC |
|           | Nos3_R3F.P           | GAGTATGAGAGAGGCCTCCA |
|           | Nos3_R3R.P           | GTGGAAGGGCTCTAGTGTGT |
| Notch1    | Notch1ChIP_+1150 F.P | ACTGCCTGCCCTTTCCTTAA |

---

Notch1ChIP\_+1150 R.P CCCACGCCATCTTAAAGAGC

---

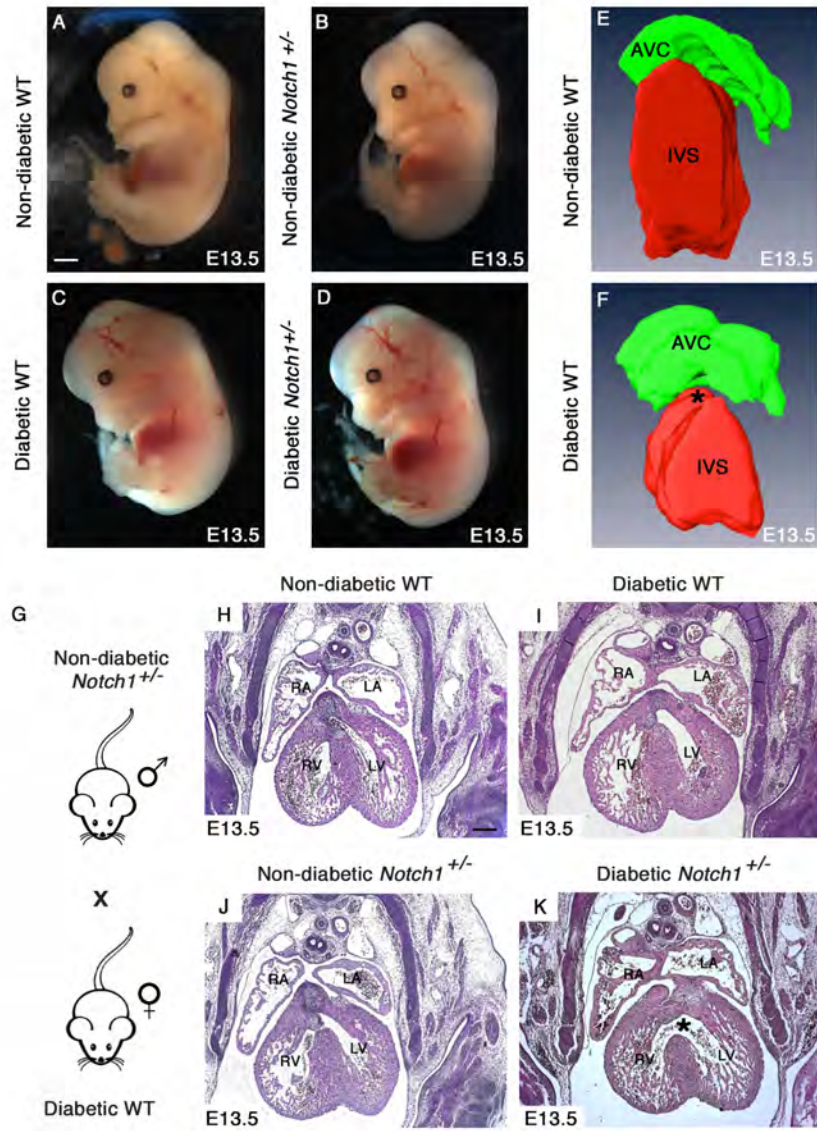

Supplemental Figure 1



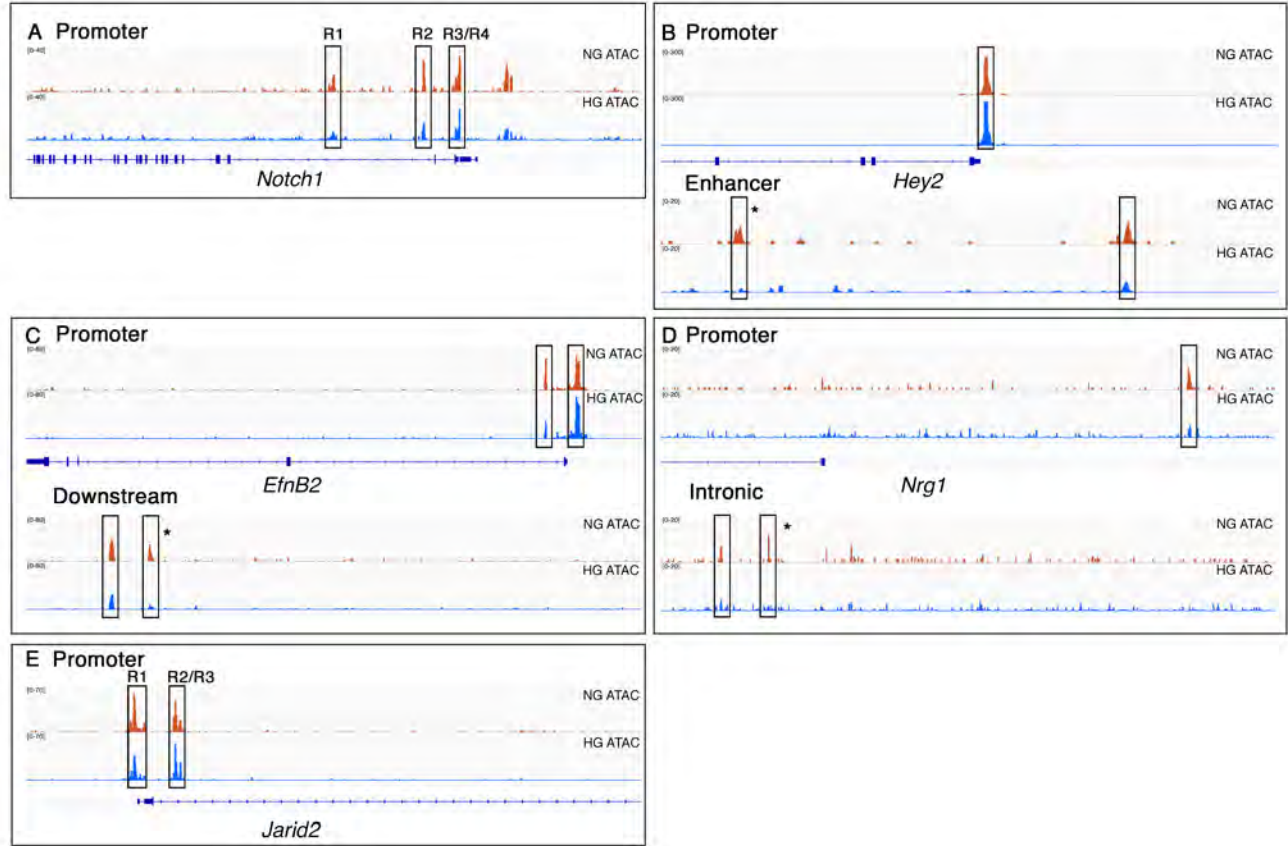

Supplemental Figure 3

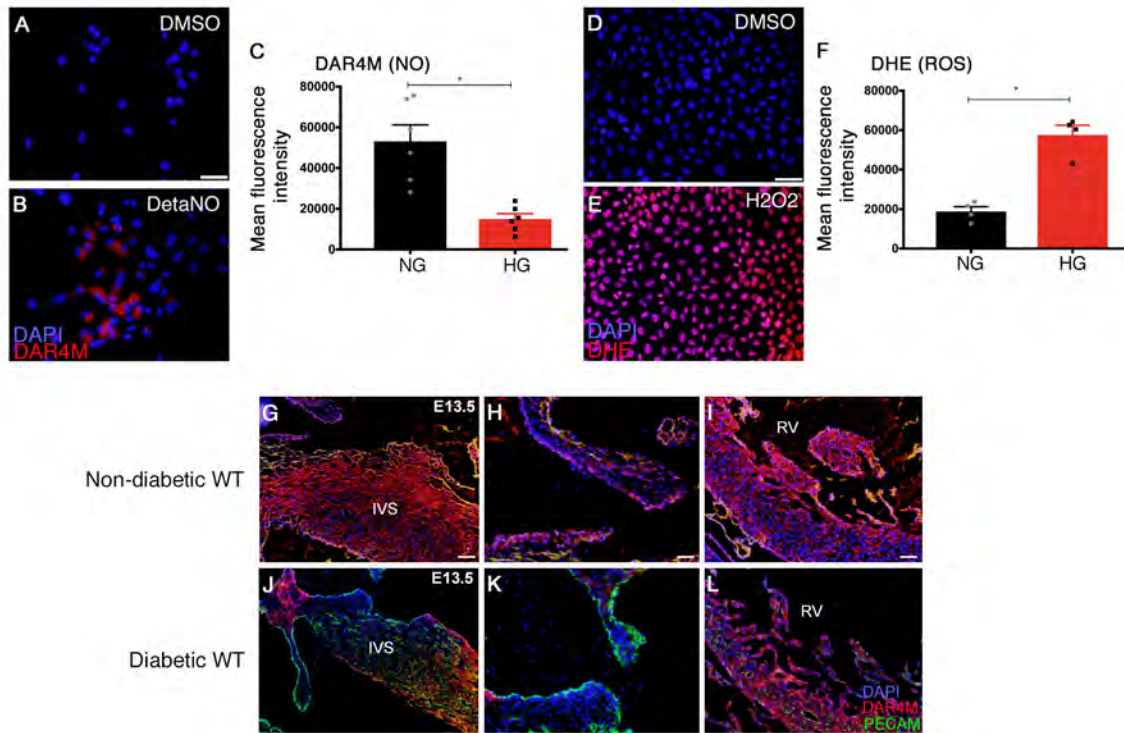

Supplemental Figure 4



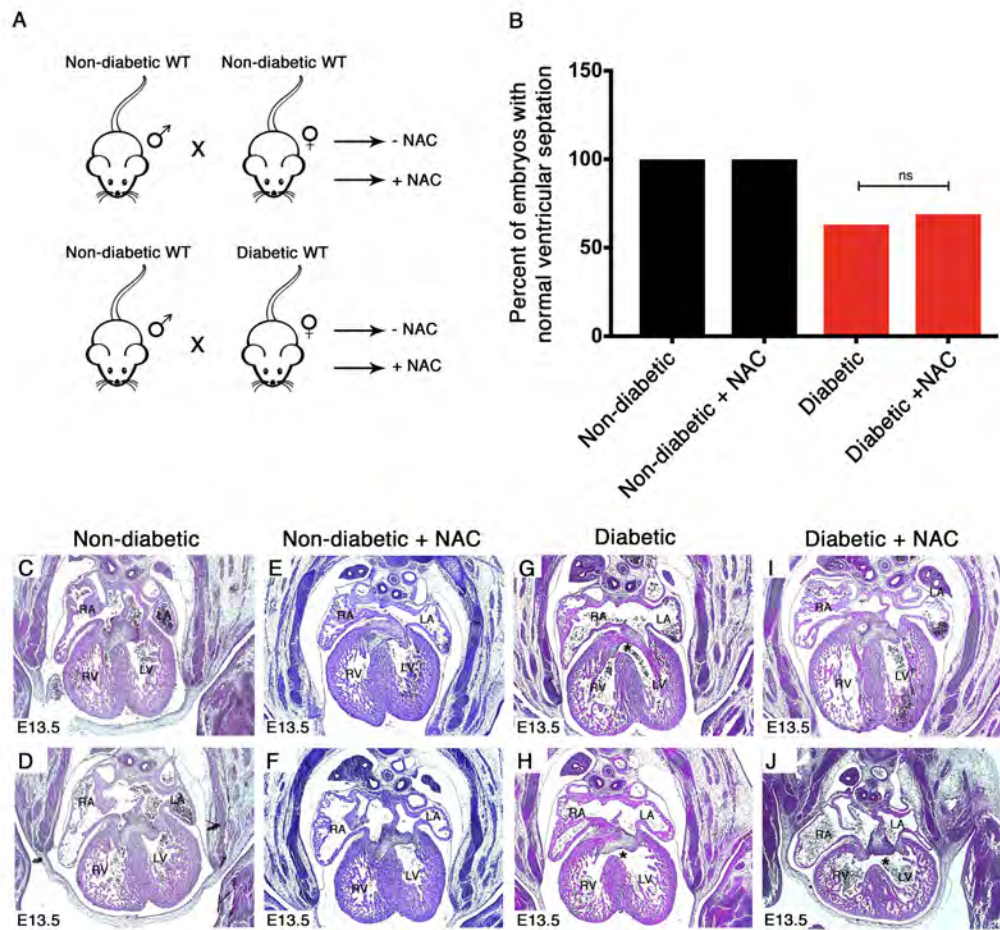

Supplemental Figure 5

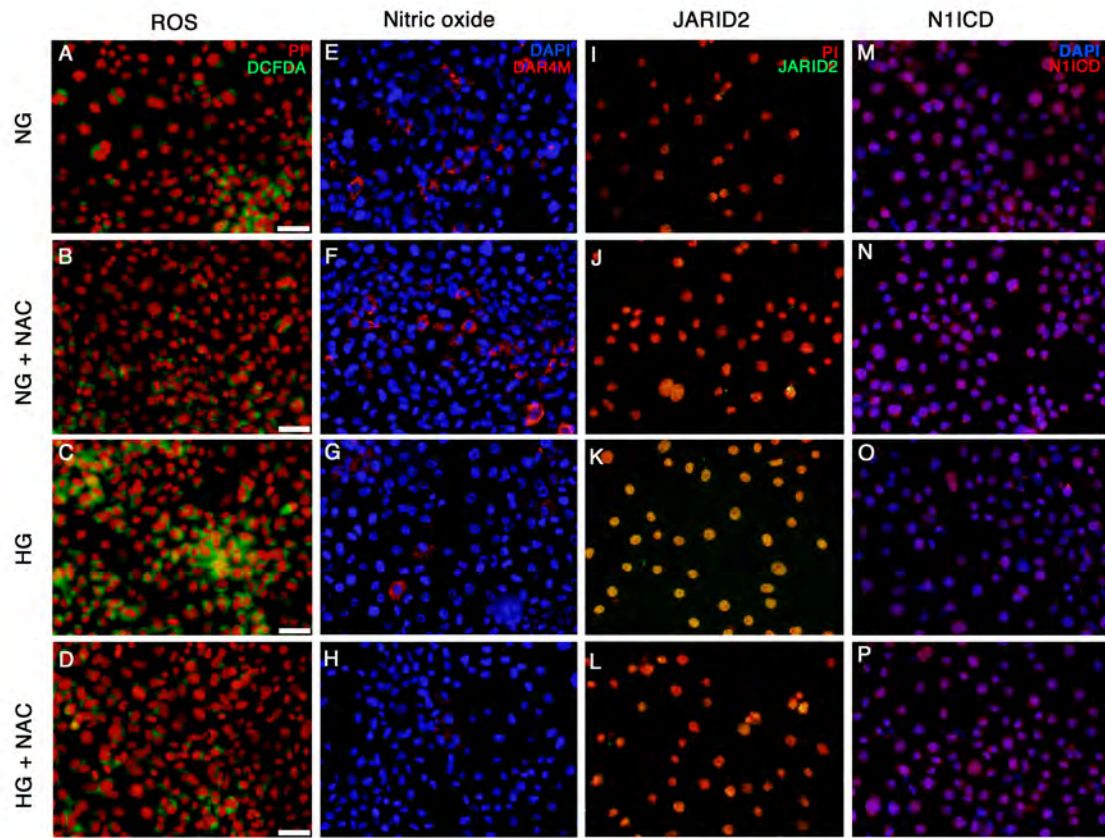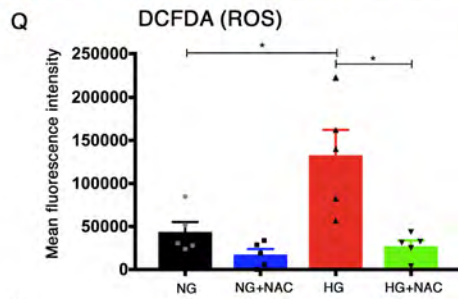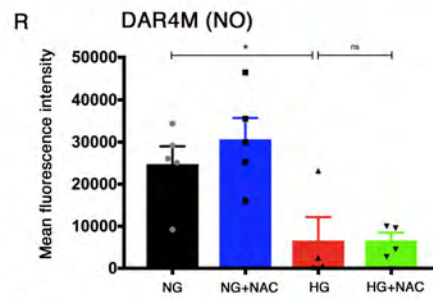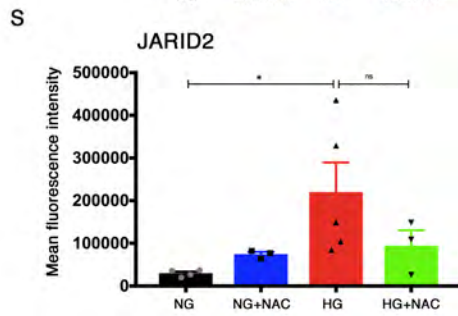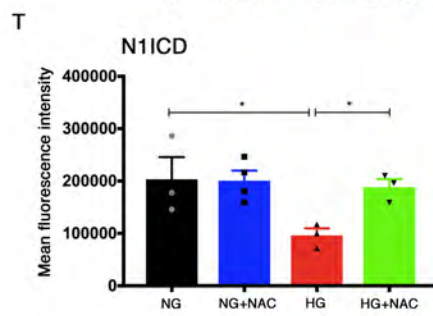

Supplemental Figure 6

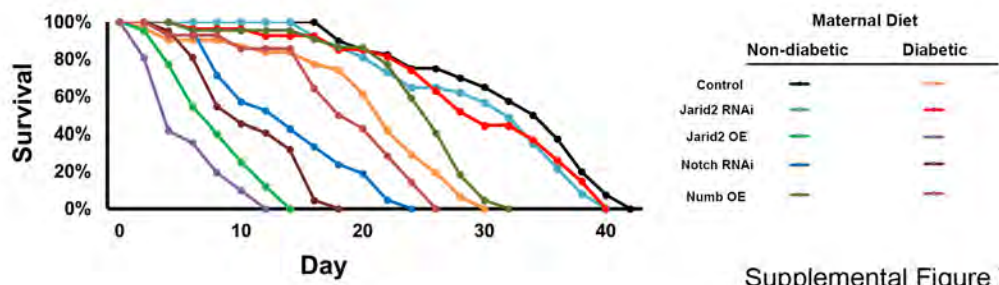

Supplemental Figure 7

A

Top 25 Enriched Gene Ontology Terms

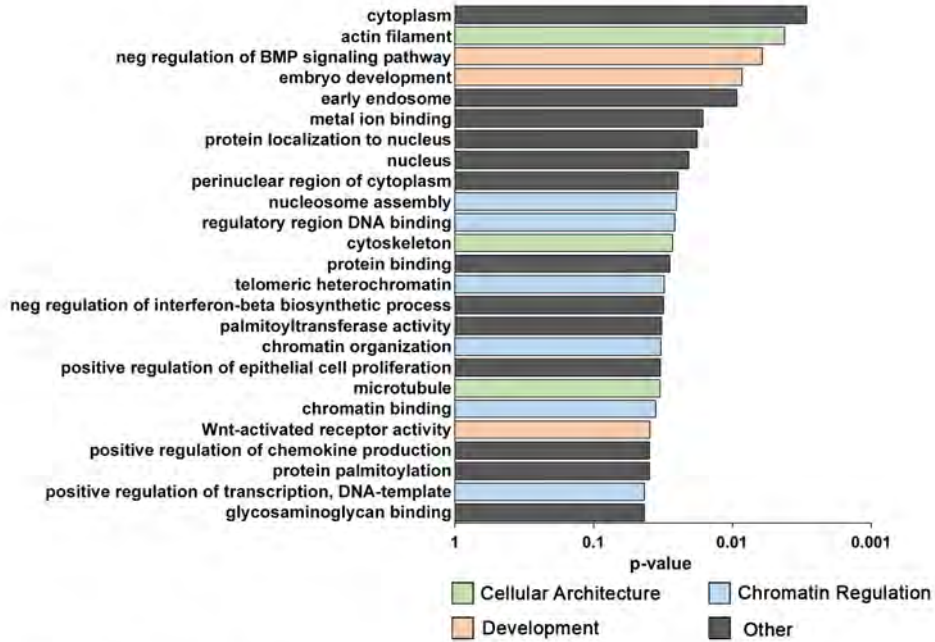

B

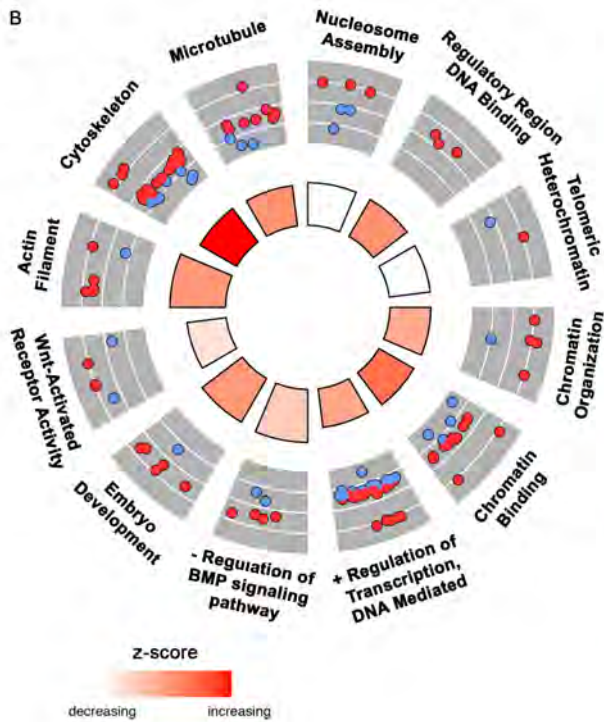

C

| Category | ID         | Term                                                |
|----------|------------|-----------------------------------------------------|
| BP       | GO:0006334 | Nucleosome Assembly                                 |
| MF       | GO:0000975 | Regulatory Region DNA Binding                       |
| CC       | GO:0031933 | Telomeric Heterochromatin                           |
| BP       | GO:0006325 | Chromatin Organization                              |
| MF       | GO:0003682 | Chromatin Binding                                   |
| BP       | GO:0045893 | Positive Regulation of Transcription, DNA-Templated |
| BP       | GO:0030514 | Negative Regulation of BMP Signaling Pathway        |
| BP       | GO:0009790 | Embryo Development                                  |
| MF       | GO:0042813 | Wnt-Activated Receptor Activity                     |
| CC       | GO:0005884 | Actin Filament                                      |
| CC       | GO:0005856 | Cytoskeleton                                        |
| CC       | GO:0005874 | Microtubule                                         |

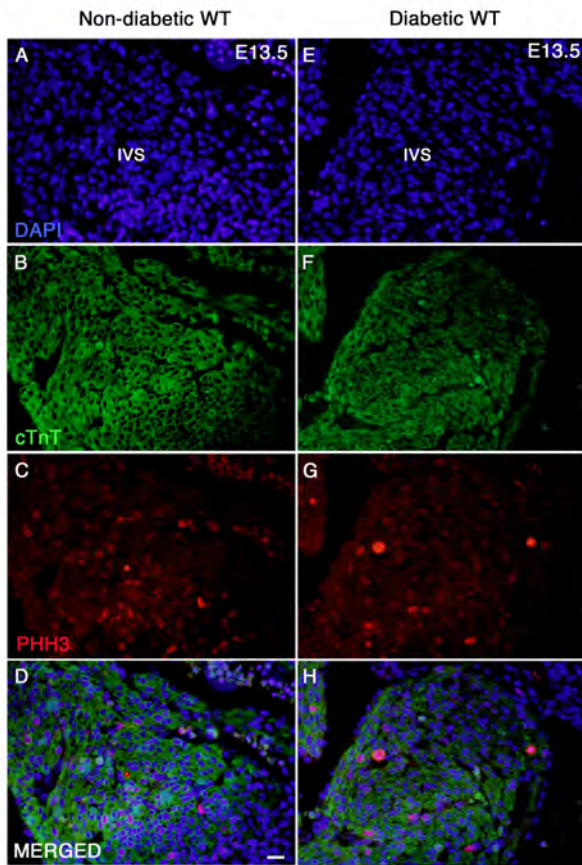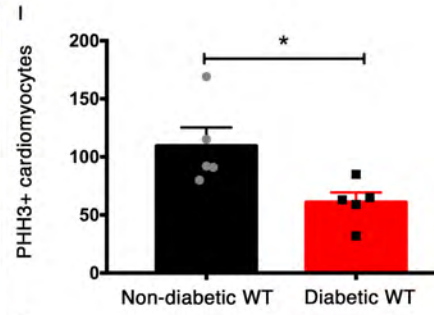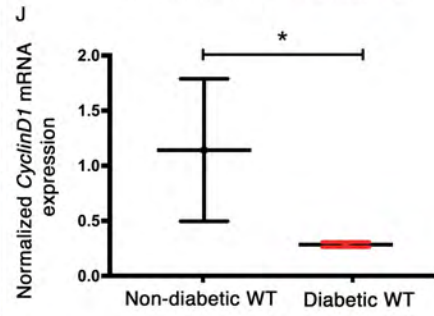

Supplement: jciinsight-2-95085-s001.pdf [file jciinsight-2-95085-s001.pdf]
